# Supplementary material for: Fetal alcohol spectrum disorders from childhood to adulthood: a Swedish population-based naturalistic cohort study of adoptees from Eastern Europe
Source: PubMed Central journal article supplement — BMJ Open. 2019 Oct 30;9(10):e032407. doi: 10.1136/bmjopen-2019-032407 (PMC6830611; doi:10.1136/bmjopen-2019-032407), 2019-10-30
Supplement: bmjopen-2019-032407supp002.pdf [file bmjopen-2019-032407supp002.pdf]

**Supplementary Table I S2.** Ophthalmological Assessments in Adoptees with Fetal Alcohol Spectrum Disorders in Childhood and Young Adulthood

|                                             | <b>Childhood (n=37)</b> | <b>Adulthood (n=29)<sup>a</sup></b> |
|---------------------------------------------|-------------------------|-------------------------------------|
| <b>Palpebral fissure length</b>             |                         |                                     |
| Right eye, median, mm (range)               | 25 (21–29)              | 29 (24–32)                          |
| Left eye, median, mm (range)                | 25 (21–29)              | 29 (24–32)                          |
| Mean z-score (SD)                           | -1.6 (0.9)              | -1.4 (1.7)                          |
| <b>Inner canthal distance</b>               |                         |                                     |
| Median, mm (range)                          | 29 (24–35)              | 32 (26–37)                          |
| Mean z-score (SD)                           | -0.2 (1.2)              | 0.0 (1.2)                           |
| ICD $\geq$ 5–10 mm>PFL <sup>b</sup> , n (%) | 17 (46)                 | 10 (35)                             |

Z-scores are calculated according to Hall et al.<sup>29</sup>

<sup>a</sup>Of 30 examined, outer ocular measurements were missing in one case.

<sup>b</sup>ICD $\geq$ 5–10mm>PFL is defined as a difference of  $\geq$ 5 mm between the inner canthal distance (ICD) and the length of the smallest palpebral fissure (PFL) in the same individual.
