# Supplementary material for: Fetal alcohol spectrum disorders from childhood to adulthood: a Swedish population-based naturalistic cohort study of adoptees from Eastern Europe
Source: PubMed Central journal article supplement — BMJ Open. 2019 Oct 30;9(10):e032407. doi: 10.1136/bmjopen-2019-032407 (PMC6830611; doi:10.1136/bmjopen-2019-032407), 2019-10-30
Supplement: bmjopen-2019-032407supp003.pdf [file bmjopen-2019-032407supp003.pdf]

**Supplementary Table II S3.** Psychological Assessments of Adoptees with Fetal Alcohol Spectrum Disorders in Childhood and Young Adulthood

|                                                                                           |                  |         |
|-------------------------------------------------------------------------------------------|------------------|---------|
| <b>Intellectual Quotient</b>                                                              |                  | n       |
| Childhood                                                                                 | 86 (50–107)      | 37      |
| Adulthood                                                                                 | 71 (36–121)      | 29      |
|                                                                                           | >85              | 3 (10)  |
|                                                                                           | 70–85            | 7 (24)  |
|                                                                                           | <70              | 19 (66) |
| <b>Leiter-R scores regarding cognitive and social abilities rated by the psychologist</b> |                  |         |
| Childhood                                                                                 | 85 (66–106)      | 37      |
| Adulthood                                                                                 | 89 (81–110)      | 29      |
|                                                                                           | >85 <sup>a</sup> | 24 (83) |
|                                                                                           | <85 <sup>b</sup> | 5 (17)  |
| <b>Adaptive behavior assessment scores in adulthood rated by parents</b>                  |                  | 26      |
| Cognitive function                                                                        | 65 (40–114)      |         |
| Social function                                                                           | 65 (50–112)      |         |
| Practical function                                                                        | 78 (58–120)      |         |
| General abilities                                                                         | 66 (40–120)      |         |

Data is presented as median (range) or numbers (percentage) as appropriate.

<sup>a</sup>One out of five was on ADHD medication.

<sup>b</sup>Six out of 24 were on ADHD medication.
